# Supplementary material
Source: PubMed Central journal article supplement (PMC3038756)
Supplement: 1017234108_pnas.201017234SI.pdf [file 1017234108_pnas.201017234SI.pdf]

# Supporting Information

Alby and Bennett 10.1073/pnas.1017234108

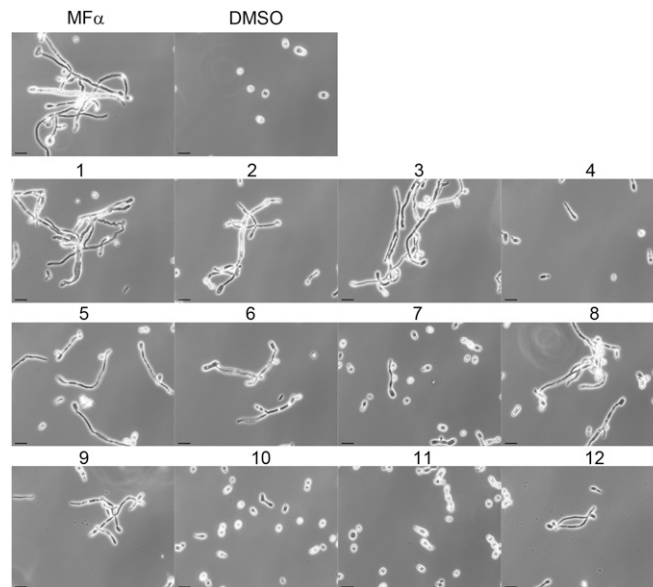

**Fig. S1.** Substituted forms of pheromone induce the formation of mating projections. Images of opaque a cells exposed to pheromone or pheromone analog for 3 d. (Scale bars, 16  $\mu$ m.)

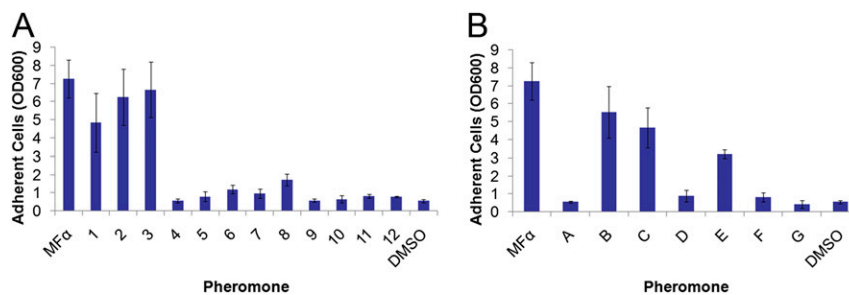

**Fig. S2.** Exposure to pheromone analogs induced adherence of *Candida albicans* white cells. *C. albicans* white a cells were exposed to 0.2 mg pheromone or analog for 24 h. Nonadherent cells were washed away, and the number of adherent cells removed and quantified using spectroscopy at OD600. (A) Di-alanine substituted analogs. (B) Analogues of different lengths (see Fig. 1 A and E).

```

Candida albicans - orf19.4481
KREAKSKGGFRLTNFGYFEPGKR DANADAGFRLTNFGYFEPGKR DANAEA GFR
LTNFGYFEPGK
Candida dubliniensis - Cd36_03810
KRDANADARFRLTNFGYFEPGKR DANADAKFKLTNFGYFEPGKR DANADAKFK
LTNFGYFEPGK
Candida tropicalis - CTRG04755.3
KRDAAKFKFRLTRYGWFSPNKR EEDAEDIIDAEKRDAAKFKFRLTRYGWFSPNKR
DIGDEEDIVDAEKRDAAKFKFRLTRYGWFSPNKR ELAEEEEETVDAEKRDAAKFKFR
LTRYGWFSPNKR EAEENDIVEKRDAAKFKFRLTRYGWFSPN
Candida parapsilosis - CPAG04964
KREAEAKPHWTTYGYEPQKR DANAEAEAKPHWTTYGYEPQKR DANAEAEAK
PHWTTYGYEPQK
Lodderomyces elongisporus - LELG05310
KRSDPGWMMWTRYGRFSPVKR DANADAAADPGWMMWTRYGRFSPVKR DANADA
AADPGWMMWTRYGRFSPVKREAEAAQYHQKRSDPGWMMWTRYGRFSPVKR DAN
ADADANPEADPGWMMWTRYGRFSPVKR DANAEADANPEADPGWMMWTRYGRFSP
VKR DANADAAADPGWMMWTRYGRFSPVKR DANADADADPGWMMWTRYGRFSPVK
    
```

**Fig. S3.** Identification of pheromone repeats in other *Candida* clade species. Red indicates likely Kex2 sites. Yellow indicates probable sites for Ste13. Green indicates putative pheromone sequences.
